# Supplementary material
Source: MDPI journal article supplement (https://www.mdpi.com/2073-4441/11/12/2447)

# Supplementary material for “Evaluation of Hydroclimatic Variability and Prospective Implementation of Irrigation Strategies in the U.S. Corn Belt”

Maria Elena Orduña Alegria <sup>1</sup>, Niels Schütze <sup>1</sup>, Dev Niyogi <sup>2</sup>

<sup>1</sup> Institute of Hydrology and Meteorology, Technische Universität Dresden, Bergstr. 66, 01069 Dresden, Germany

<sup>2</sup> Department of Agronomy and Department of Earth, Atmospheric, and Planetary Sciences, Purdue University, West Lafayette, IN, USA

Correspondence: maria\_elena.orduna\_alegria@tu-dresden.de

**SII: Extensive simulation results for all study sites in the different initial soil moisture conditions (ISM).**

■ S1\_RF   ■ S2\_FI   ■ S3\_DI   ··· S4\_CFS   - - S5\_ODT   - - S6\_ODTph   - - S7\_GO

**Figure SII.1.** Results for site (W1) Kirksville, MO for 1) Historical (H) and 2) Future (F) climatic conditions for all the initial soil moisture evaluated.

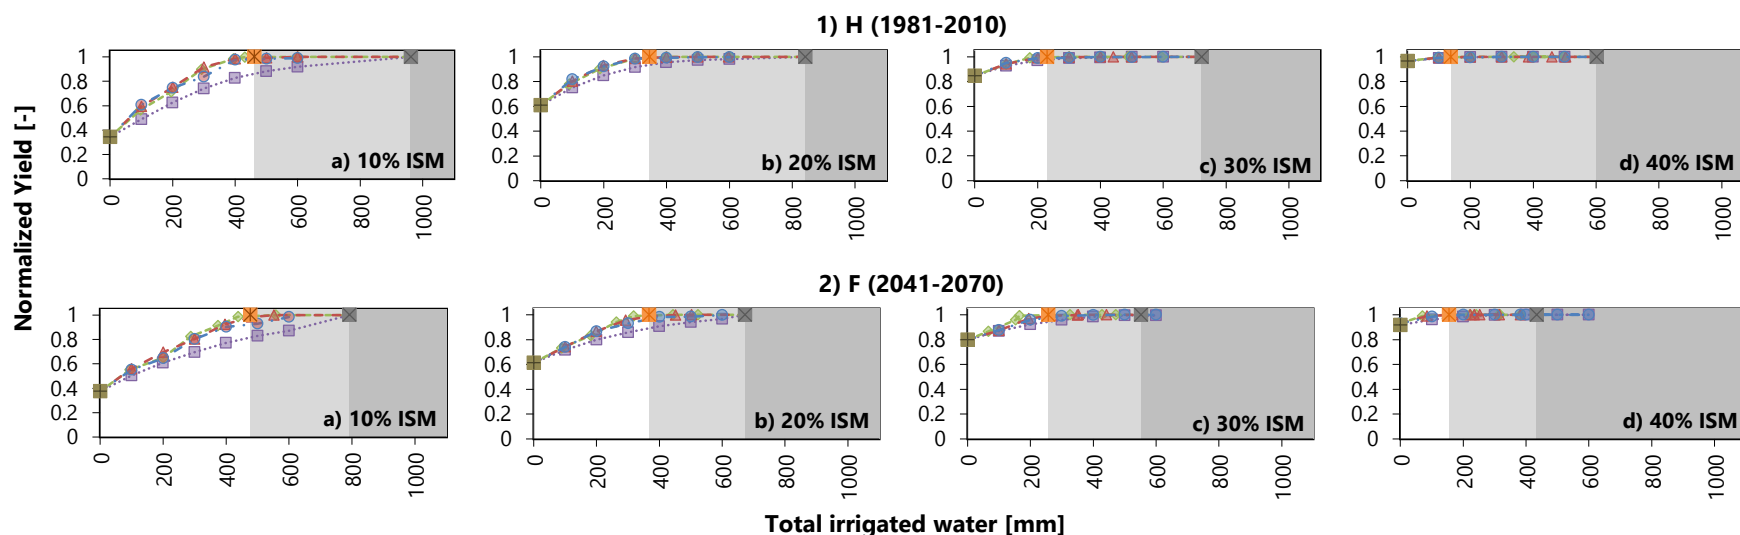

**Figure SII.2.** Results for site (W2) **Topeka, KS** for 1) Historical (H) and 2) Future (F) climatic conditions for all the initial soil moisture evaluated.

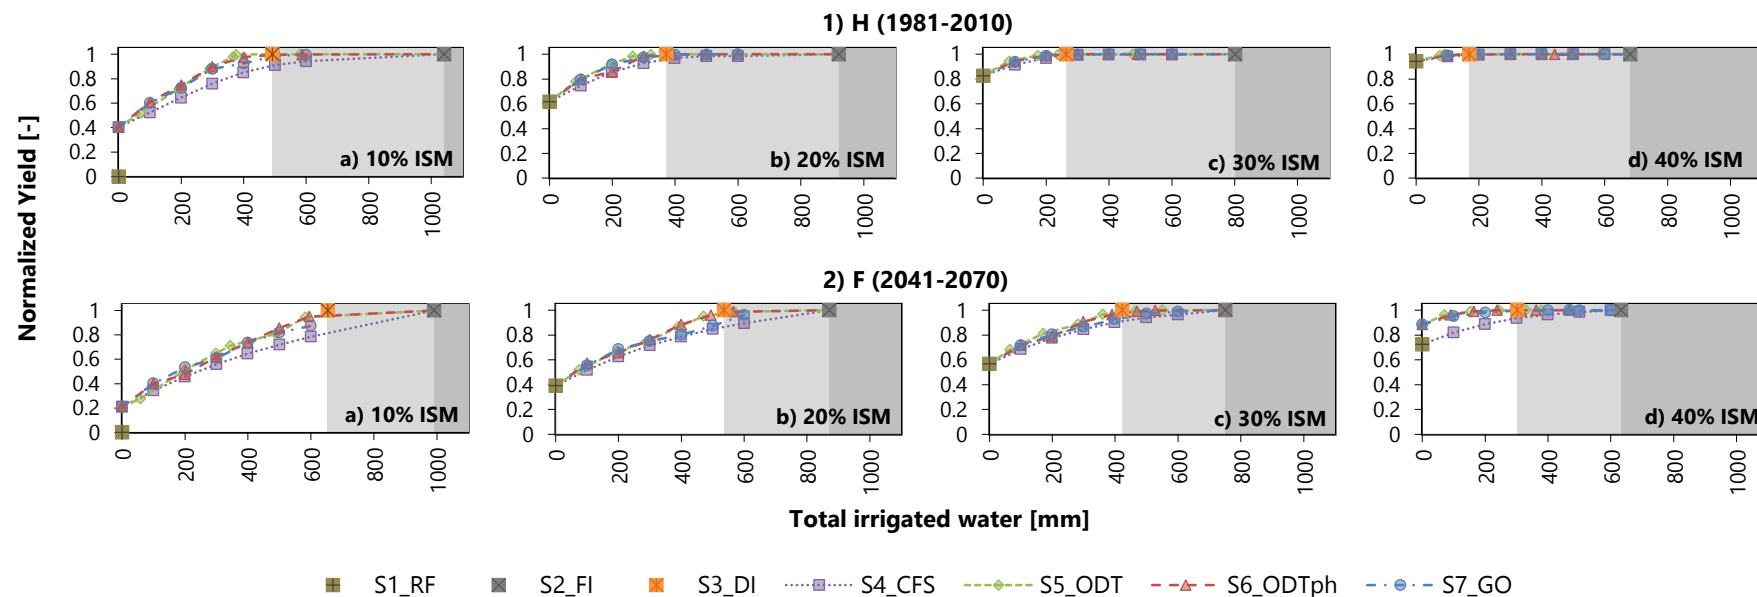

**Figure SII.3.** Results for site (W3) **New Madrid, MO** for 1) Historical (H) and 2) Future (F) climatic conditions for all the initial soil moisture evaluated.

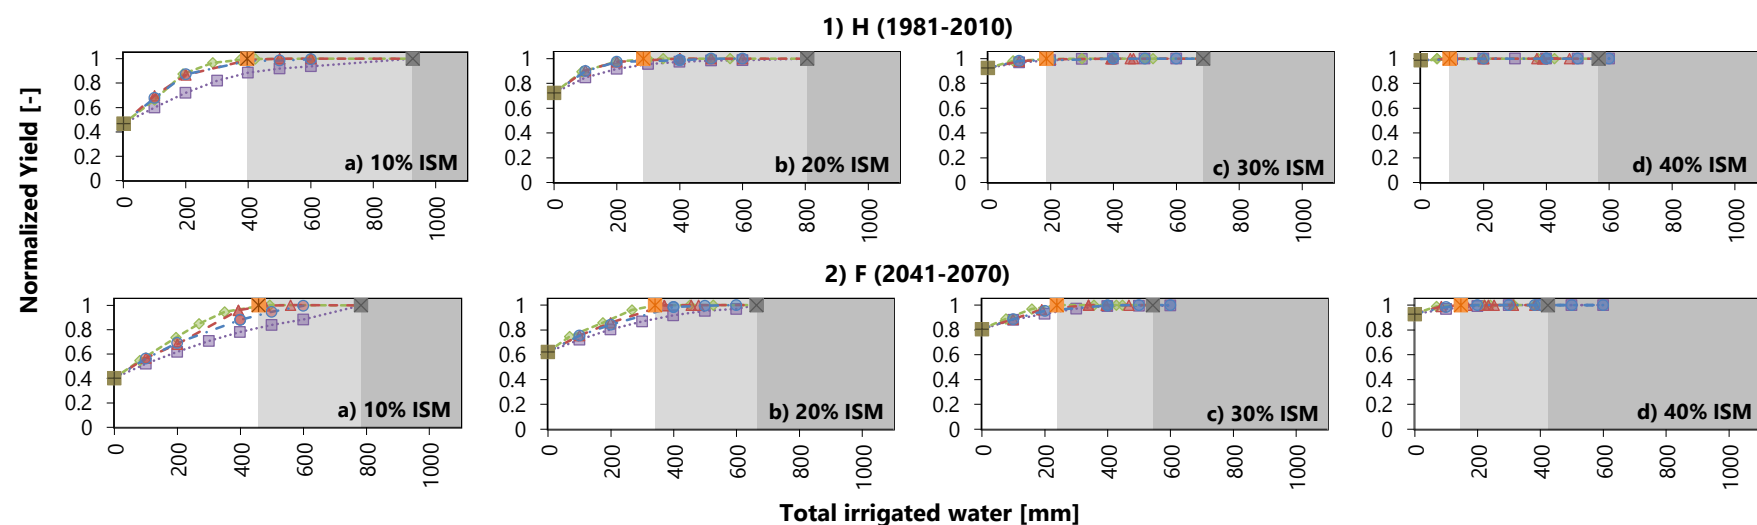

**Figure SII.4.** Results for site **(W4) Olivia, MN** for 1) Historical (H) and 2) Future (F) climatic conditions for all the initial soil moisture evaluated.

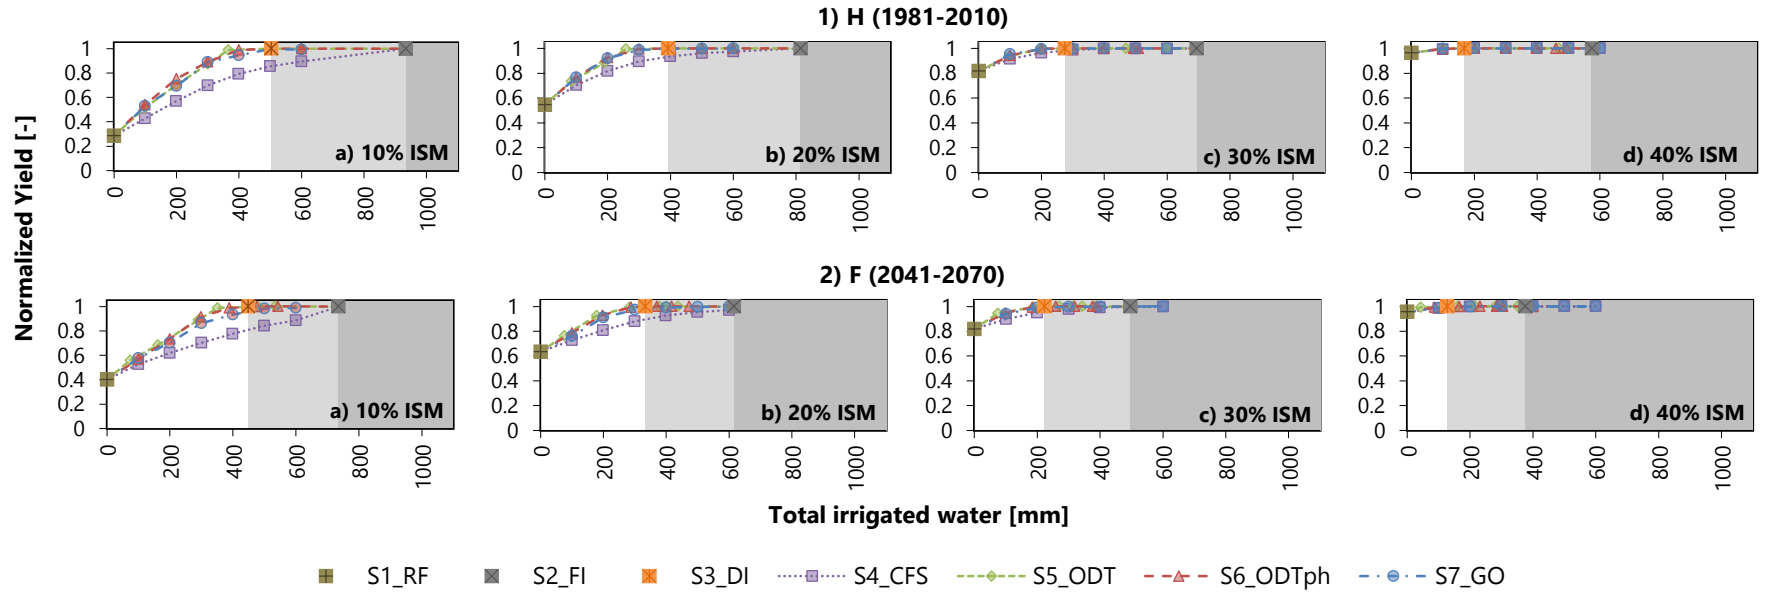

**Figure SII.5.** Results for site **(W5) Brookings, SD** for 1) Historical (H) and 2) Future (F) climatic conditions for all the initial soil moisture evaluated.

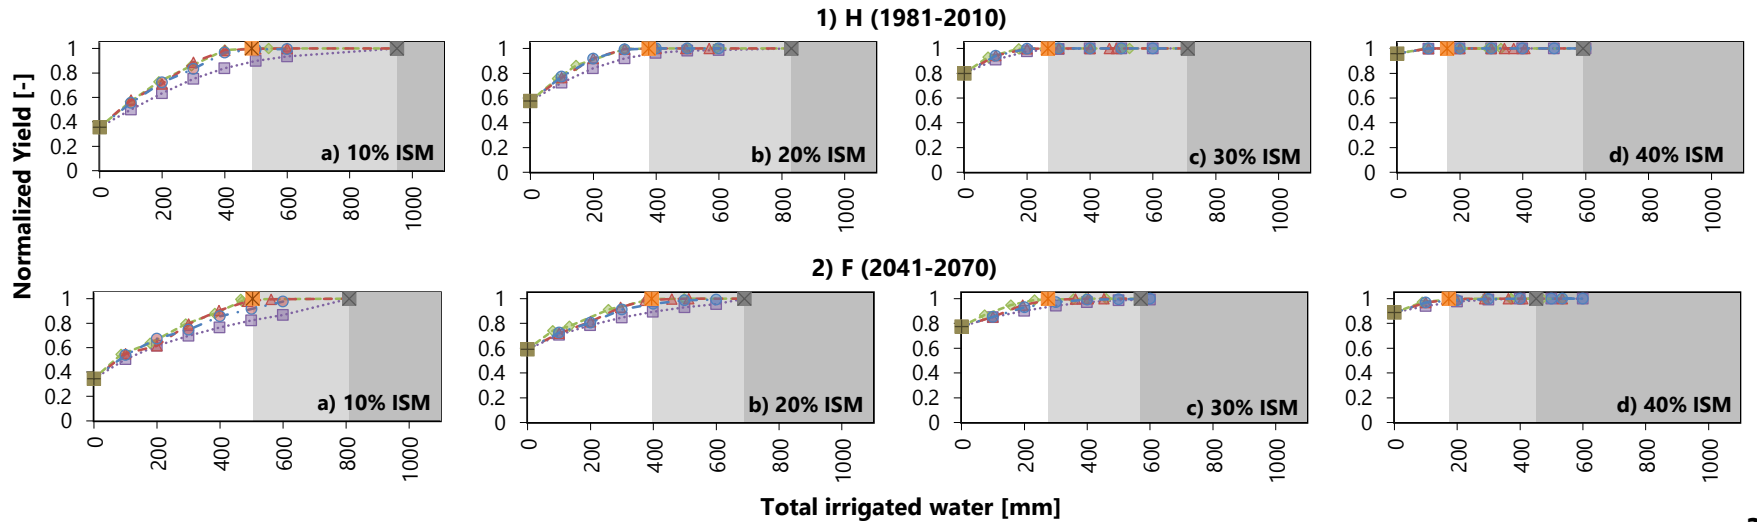

**Figure SII.6.** Results for site **(W6) Iowa City, IO** for 1) Historical (H) and 2) Future (F) climatic conditions for all the initial soil moisture evaluated.

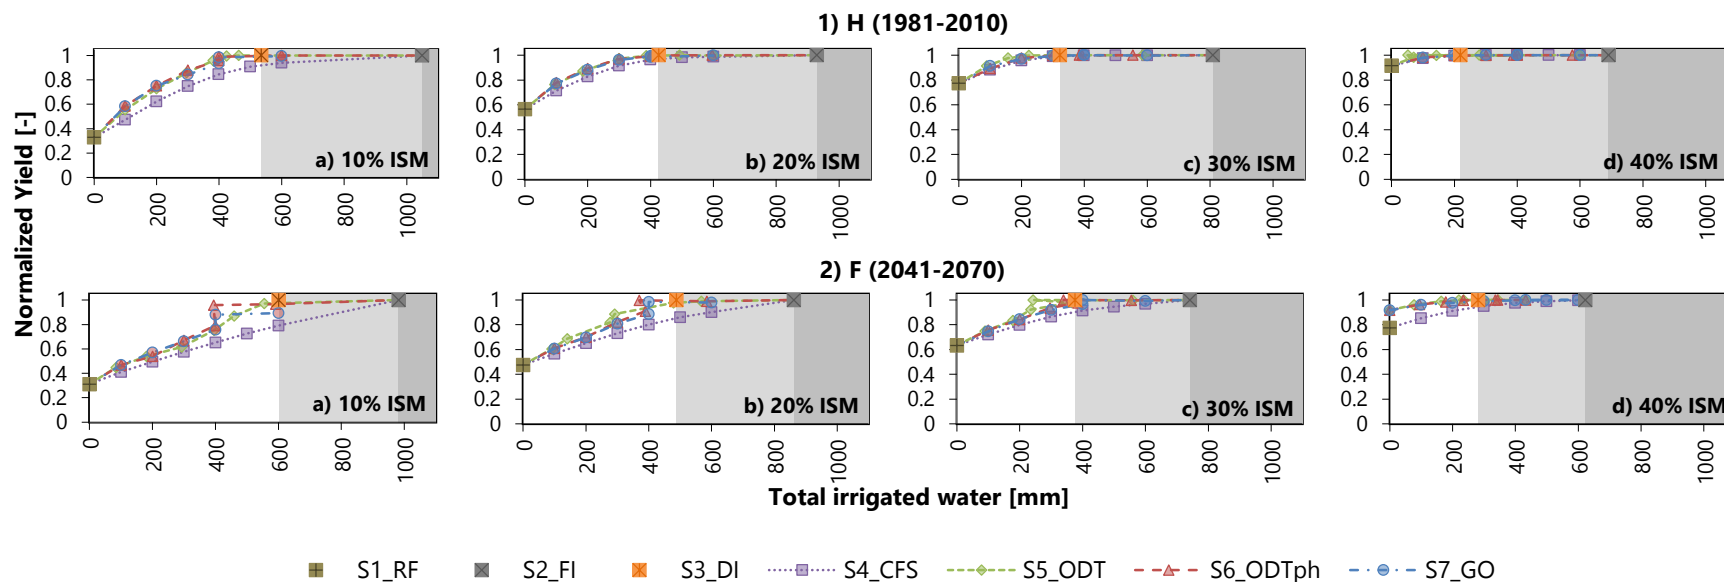

**Figure SII.7.** Results for site **(W7) Grand Forks, ND** for 1) Historical (H) and 2) Future (F) climatic conditions for all the initial soil moisture evaluated.

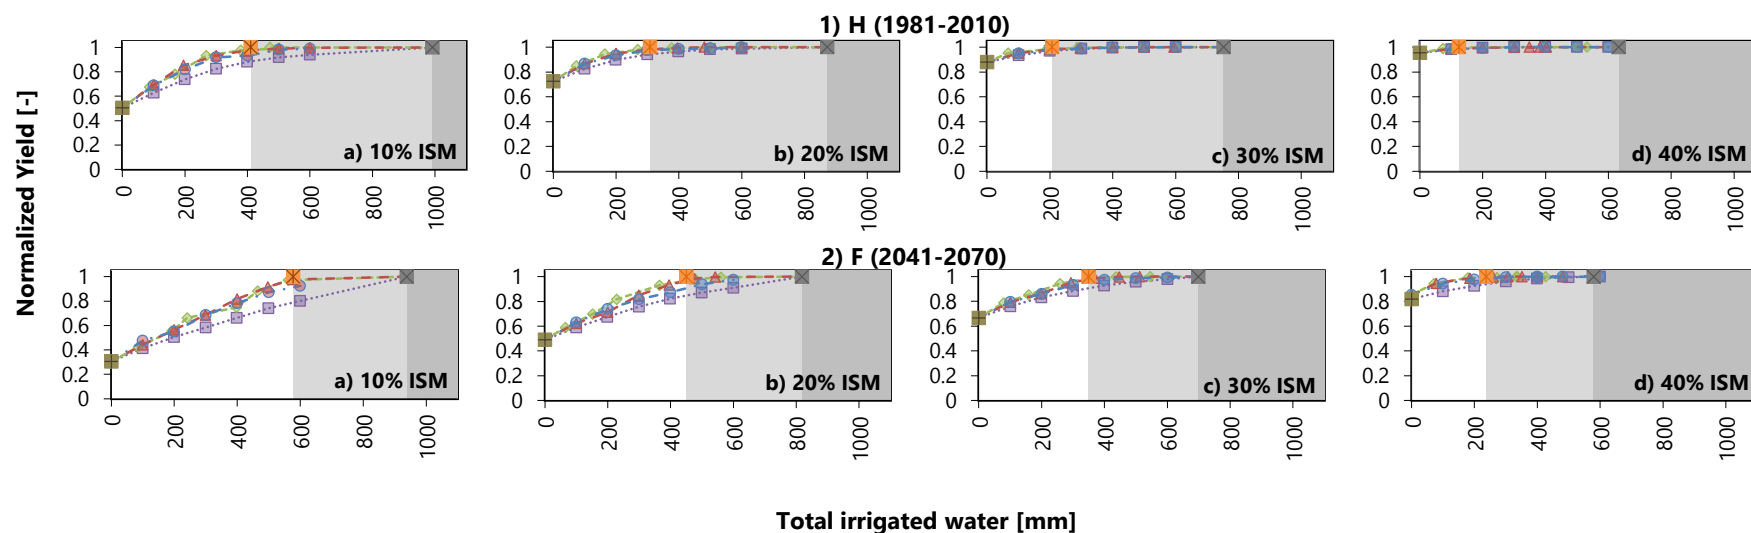

**Figure SII.8.** Results for site (W8) in **Columbus, NE** for 1) Historical (H) and 2) Future (F) climatic conditions for all the initial soil moisture evaluated.

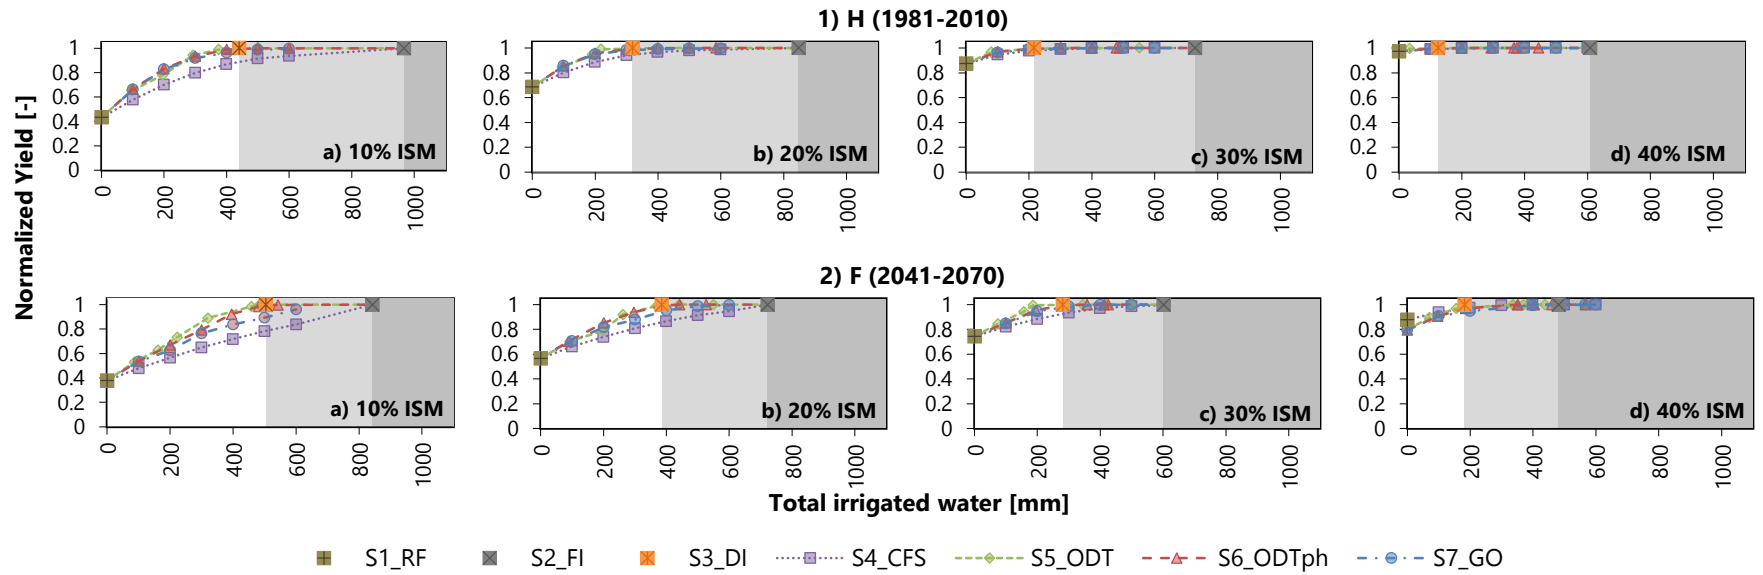

**Figure SII.9.** Results for site (W9) **Rochester, MN** for 1) Historical (H) and 2) Future (F) climatic conditions for all the initial soil moisture evaluated.

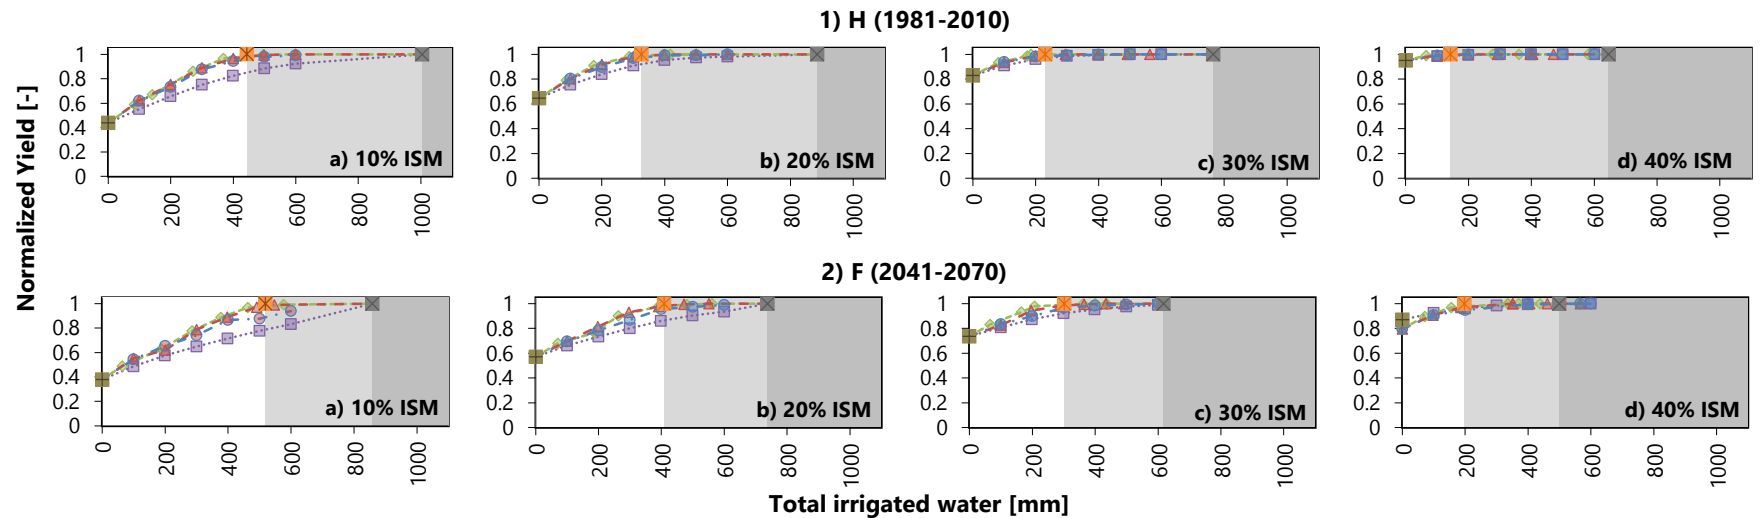

**Figure SII.10.** Results for site **(E1)** in **Marysville, OH** for 1) Historical (H) and 2) Future (F) climatic conditions for all the initial soil moisture evaluated.

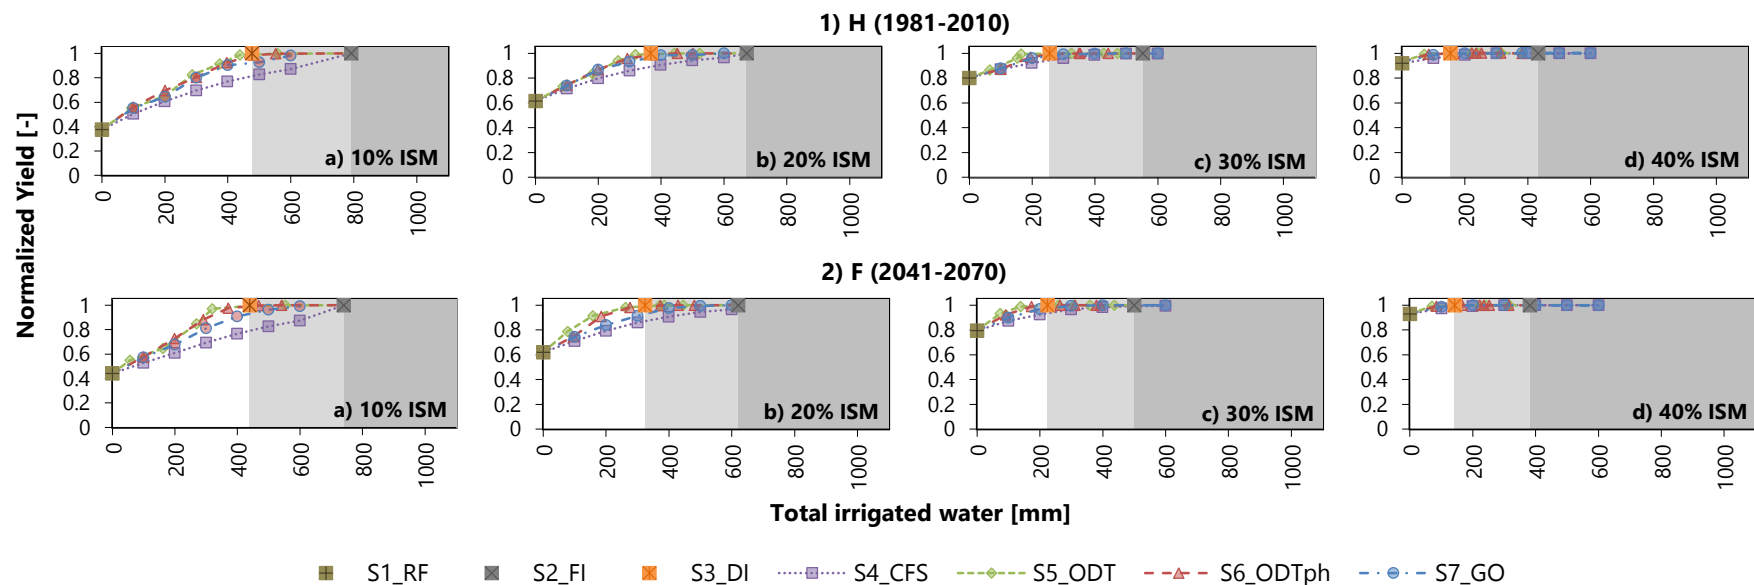

**Figure SII.11.** Results for site **(E2)** **Toledo, OH** for 1) Historical (H) and 2) Future (F) climatic conditions for all the initial soil moisture evaluated.

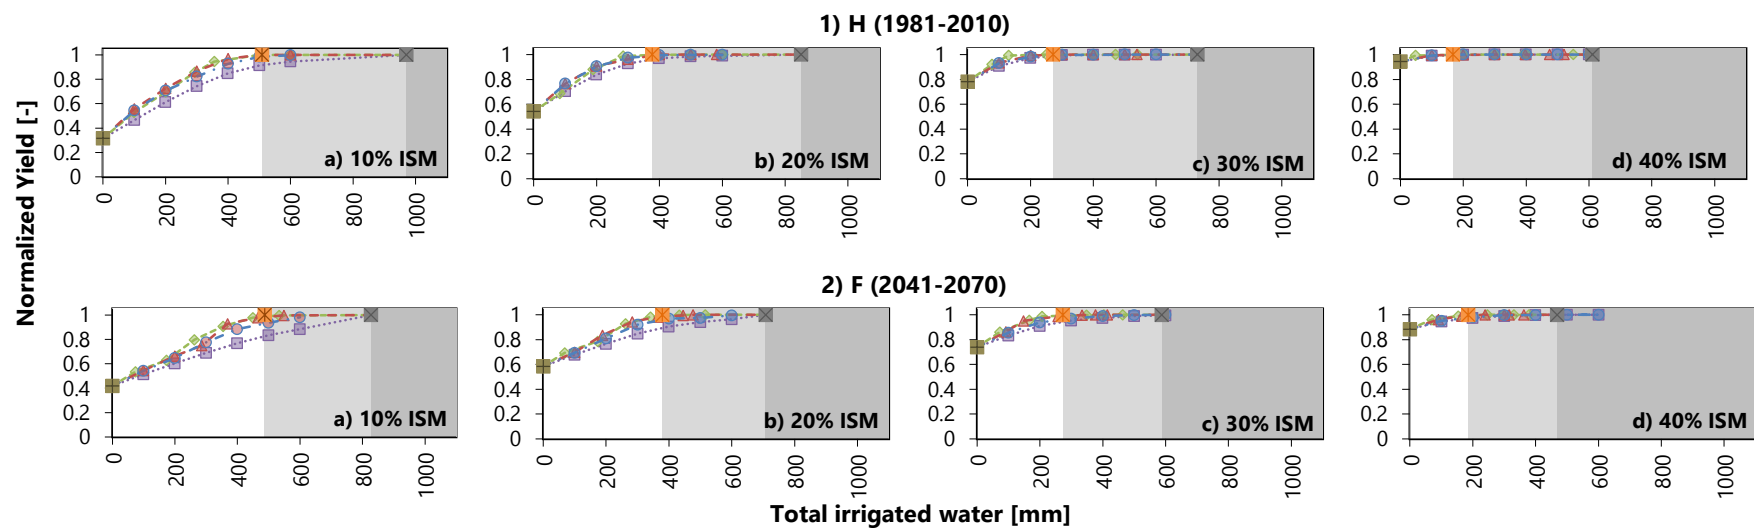

**Figure SII.12.** Results for site (E3) in **Huntington, IN** for 1) Historical (H) and 2) Future (F) climatic conditions for all the initial soil moisture evaluated.

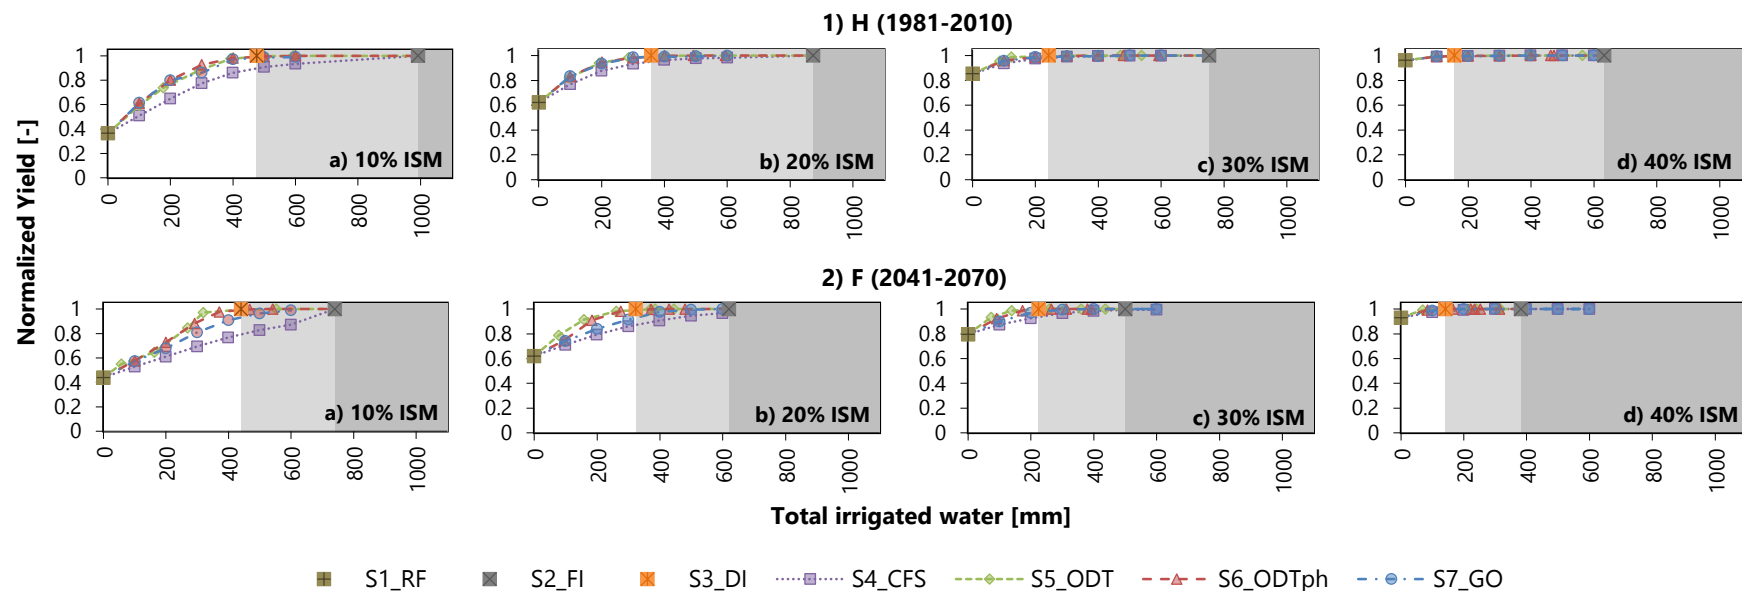

**Figure SII.13.** Results for site (E4) **Baraboo, WI** for 1) Historical (H) and 2) Future (F) climatic conditions for all the initial soil moisture evaluated.

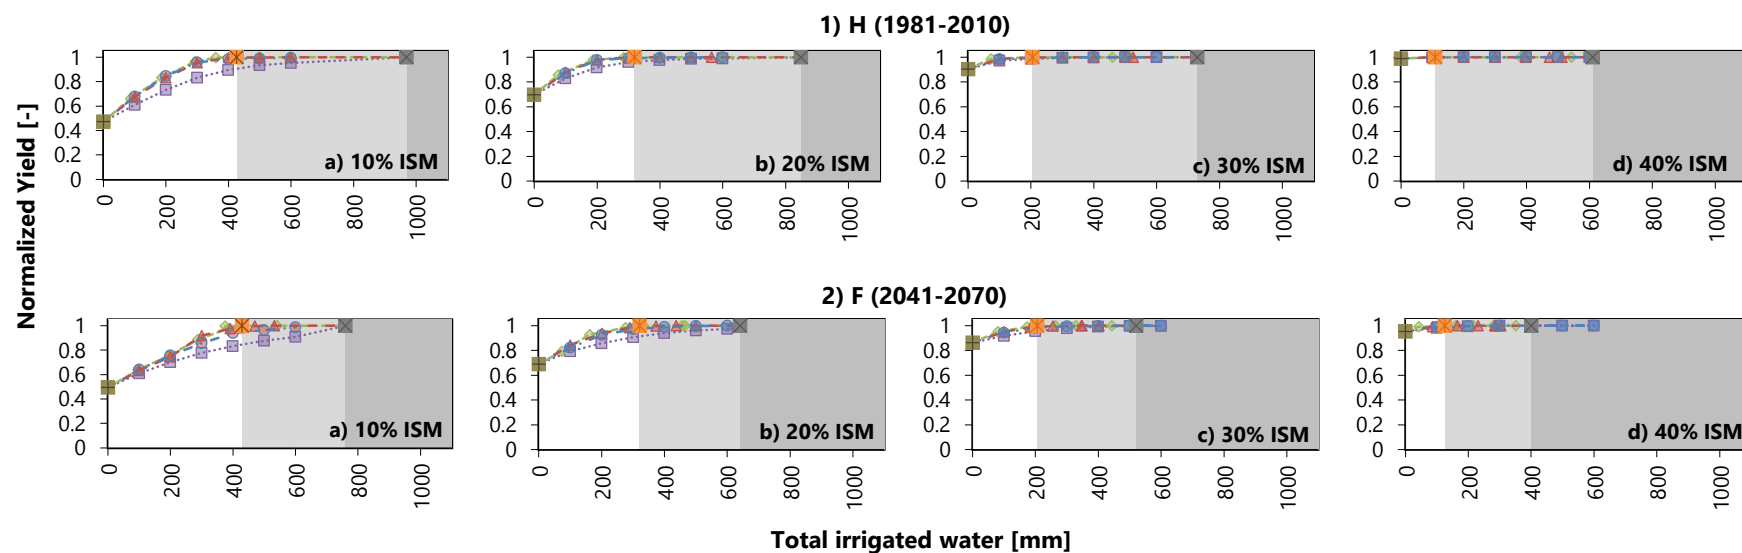

**Figure SII.14.** Results for site **(E5) Dekalb, IL** for 1) Historical (H) and 2) Future (F) climatic conditions for all the initial soil moisture evaluated.

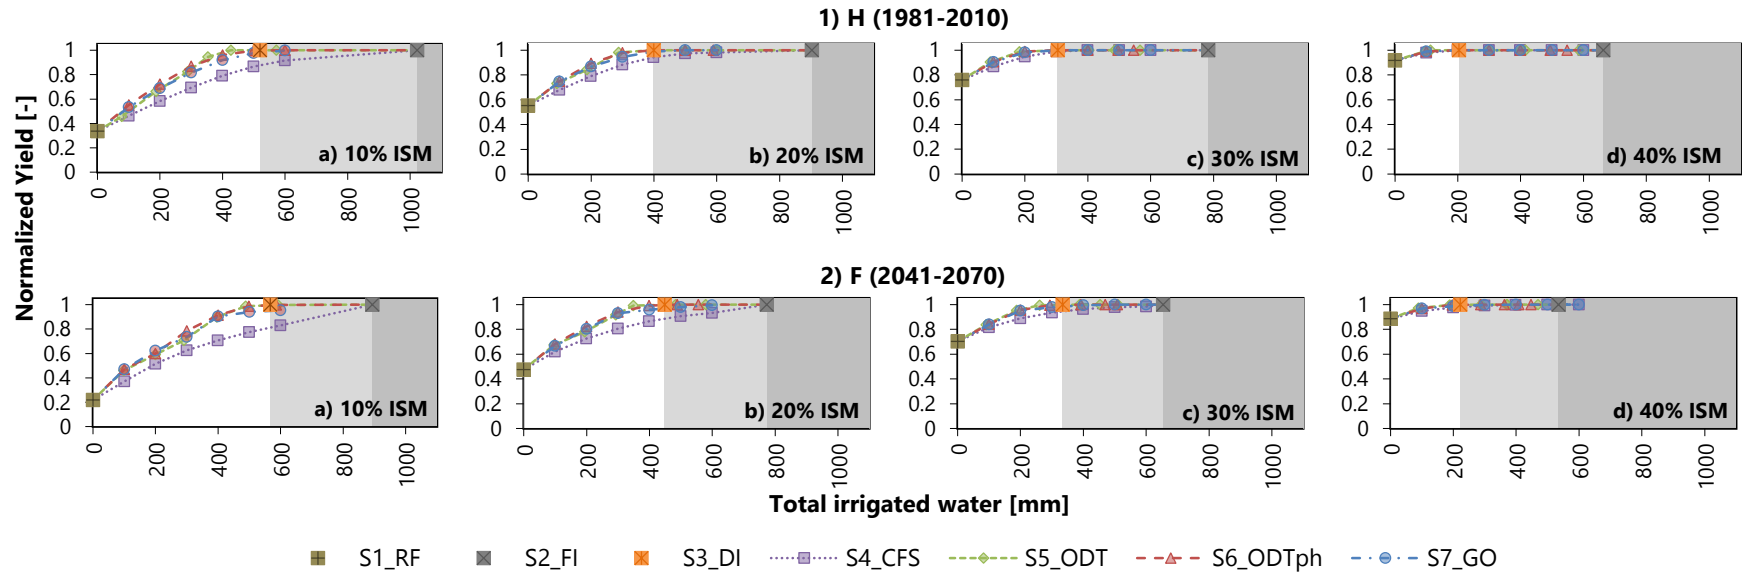

**Figure SII.15.** Results for site **(E6) Beloit, WI** for 1) Historical (H) and 2) Future (F) climatic conditions for all the initial soil moisture evaluated.

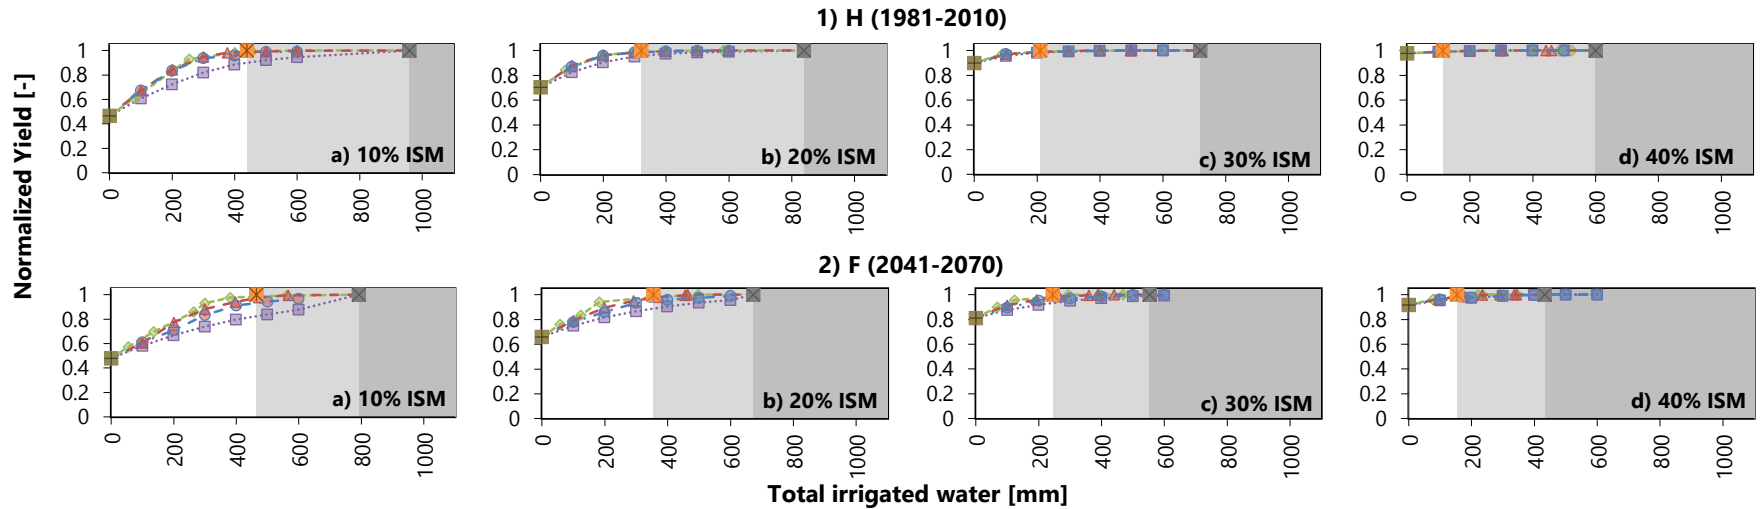



**Figure SII.16.** Results for site **(E7) Rensselaer, IN** for 1) Historical (H) and 2) Future (F) climatic conditions for all the initial soil moisture evaluated.

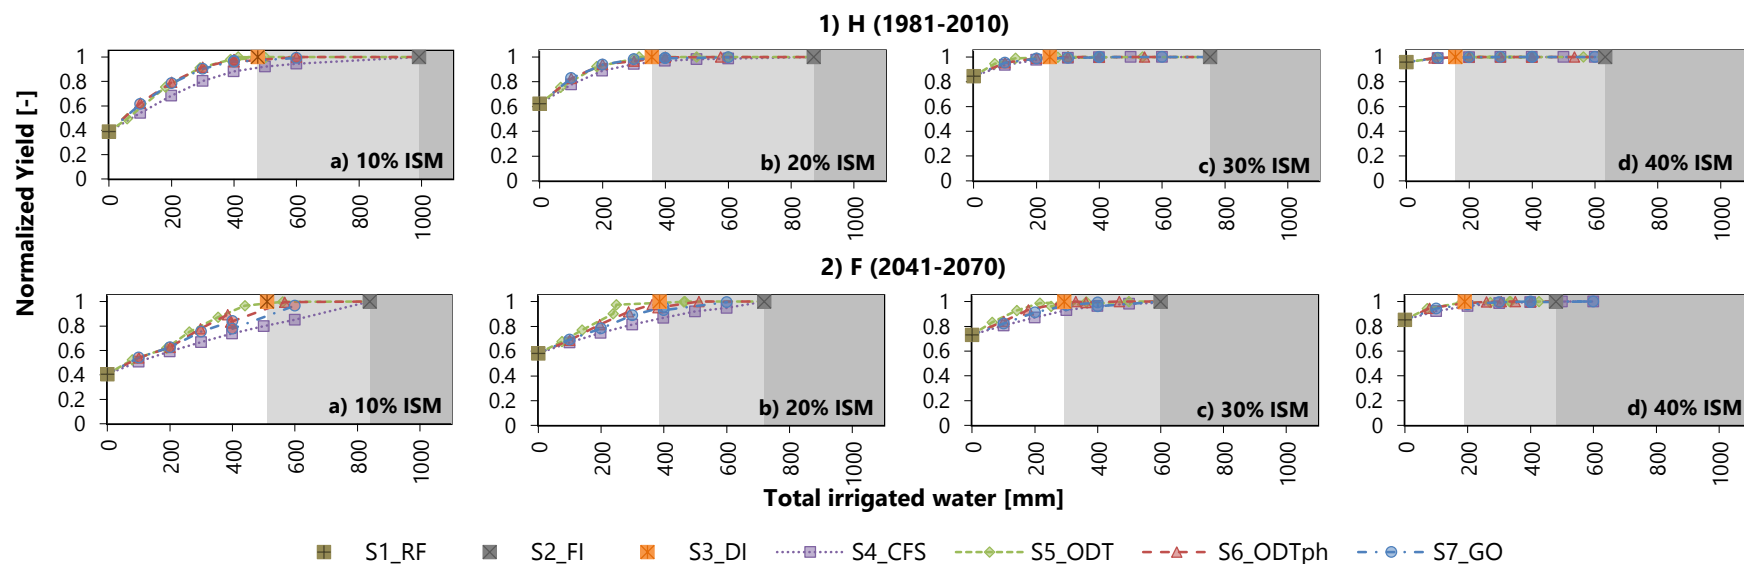

**Figure SII.17.** Results for site **(E8) Tuscola, IL** for 1) Historical (H) and 2) Future (F) climatic conditions for all the initial soil moisture evaluated.

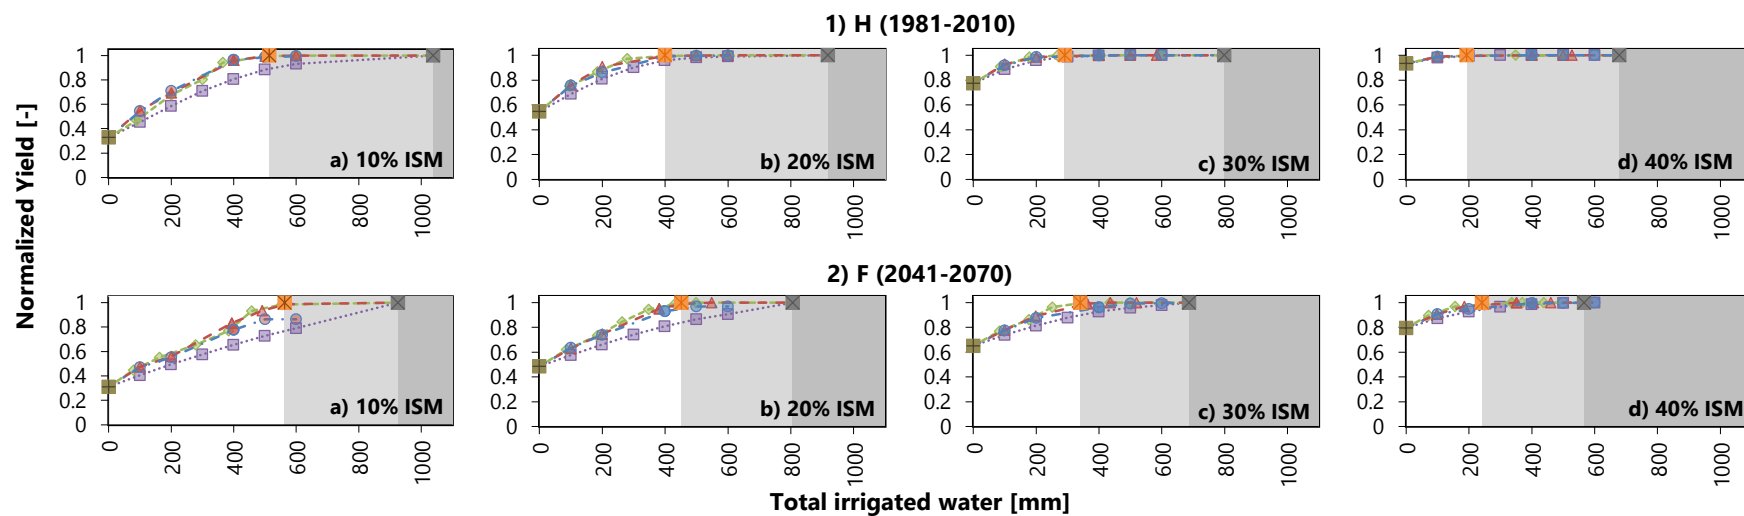

Supplement: s1 [file s1]
