# Supplementary material
Source: MDPI journal article supplement (https://www.mdpi.com/2073-4441/11/12/2447)
Supplement: s1 [file s1]

# Supplementary material for “Evaluation of Hydroclimatic Variability and Prospective Implementation of Irrigation Strategies in the U.S. Corn Belt”

Maria Elena Orduña Alegria <sup>1</sup>, Niels Schütze <sup>1</sup>, Dev Niyogi <sup>2</sup>

<sup>1</sup> Institute of Hydrology and Meteorology, Technische Universität Dresden, Bergstr. 66, 01069 Dresden, Germany

<sup>2</sup> Department of Agronomy and Department of Earth, Atmospheric, and Planetary Sciences, Purdue University, West Lafayette, IN, USA

Correspondence: maria\_elena.orduna\_alegria@tu-dresden.de

## SIII: Detailed evaluation of the optimal irrigation strategy for future climatic conditions in the different initial soil moisture conditions (ISM).

**Table SIII.1 Optimal irrigation strategy in dry soil conditions (10 and 20 % ISM).**

| Site        | Code | ISM 10 %                                                                                     |                       |                    | ISM 20 %                                                                                       |                       |                    |
|-------------|------|----------------------------------------------------------------------------------------------|-----------------------|--------------------|------------------------------------------------------------------------------------------------|-----------------------|--------------------|
|             |      | Optimal Strategy                                                                             | Increase in Yield [%] | Water Savings [mm] | Optimal Strategy                                                                               | Increase in Yield [%] | Water Savings [mm] |
| Marysville  | E1   | S5_ODT      | 52                    | 28.1               | S5_ODT      | 33                    | 1.9                |
| Toledo      | E2   | S5_ODT      | 64                    | 82.1               | S6_ODTph    | 43                    | 90.9               |
| Huntington  | E3   | S6_ODTph    | 57                    | 121.2              | S5_ODT      | 37                    | 98.1               |
| Baraboo     | E4   | S5_ODT      | 48                    | 72.6               | S6_ODTph    | 26                    | 50.6               |
| Dekalb      | E5   | S5_ODT      | 67                    | 16.4               | S5_ODT      | 39                    | 8.8                |
| Beloit      | E6   | S5_ODT      | 54                    | 66.6               | S6_ODTph    | 30                    | 44.8               |
| Rensselaer  | E7   | S3_DI       | 64                    | -                  | S6_ODTph    | 38                    | 45                 |
| Tuscola     | E8   | S5_ODT      | 77                    | 31.7               | S5_ODT      | 54                    | 25.4               |
| Kirksville  | W1   | S3_DI       | 83                    | -                  | S3_DI       | 54                    | -                  |
| Topeka      | W2   | S3_DI       | 85                    | -                  | S3_DI       | 68                    | -                  |
| New Madrid  | W3   | S5_ODT    | 79                    | 63.8               | S5_ODT    | 57                    | 2.6                |
| Olivia      | W4   | S5_ODT    | 66                    | 23                 | S6_ODTph  | 33                    | 40.4               |
| Brookings   | W5   | S5_ODT    | 69                    | 35.4               | S6_ODTph  | 43                    | 15.4               |
| Iowa City   | W6   | S5_ODT    | 70                    | 48.4               | S5_ODT    | 42                    | 23.4               |
| Grand Forks | W7   | S6_ODTph  | 60                    | 168.6              | S5_ODT    | 35                    | 69.8               |
| Columbus    | W8   | S5_ODT    | 85                    | 103.2              | S5_ODT    | 54                    | 137.5              |
| Rochester   | W9   | S3_DI     | 58                    | -                  | S3_DI     | 31                    | -                  |

**Table SIII.2 Optimal irrigation strategy in wet soil conditions ( 30 and 40 % ISM).**

| Site        | Code | ISM 30                                                                                       |                       |                    | ISM 40                                                                                         |                       |                    |
|-------------|------|----------------------------------------------------------------------------------------------|-----------------------|--------------------|------------------------------------------------------------------------------------------------|-----------------------|--------------------|
|             |      | Optimal Strategy                                                                             | Increase in Yield [%] | Water Savings [mm] | Optimal Strategy                                                                               | Increase in Yield [%] | Water Savings [mm] |
| Marysville  | E1   | S5_ODT      | 19                    | 21.5               | S4_CFS      | 5                     | 46                 |
| Toledo      | E2   | S5_ODT      | 20                    | 114                | S5_ODT      | 3                     | 97.03              |
| Huntington  | E3   | S5_ODT      | 18                    | 107.8              | S5_ODT      | 2                     | 81.78              |
| Baraboo     | E4   | S6_ODTph    | 7                     | 103.58             | S1_RF       | 0                     | 58.33              |
| Dekalb      | E5   | S5_ODT      | 16                    | 38.7               | S6_ODTph    | 3                     | 56.21              |
| Beloit      | E6   | S5_ODT      | 11                    | 88.2               | S1_RF       | 0                     | 26.77              |
| Rensselaer  | E7   | S6_ODTph    | 19                    | 131.7              | S5_ODT      | 6                     | 93.65              |
| Tuscola     | E8   | S5_ODT      | 31                    | 104.4              | S5_ODT      | 12                    | 71                 |
| Kirksville  | W1   | S3_DI       | 22                    | -                  | S7_GO       | 7                     | 27.6               |
| Topeka      | W2   | S5_ODT      | 45                    | 54.7               | S5_ODT      | 21                    | 39                 |
| New Madrid  | W3   | S5_ODT      | 35                    | 7                  | S5_ODT      | 16                    | 48.7               |
| Olivia      | W4   | S5_ODT      | 14                    | 66.5               | S5_ODT      | 1                     | 9.12               |
| Brookings   | W5   | S5_ODT      | 18                    | 67.5               | S7_GO       | 5                     | 91.6               |
| Iowa City   | W6   | S5_ODT      | 22                    | 92.5               | S6_ODTph    | 5                     | 97.42              |
| Grand Forks | W7   | S6_ODTph  | 16                    | 37.1               | S6_ODTph  | 1                     | 30.15              |
| Columbus    | W8   | S5_ODT    | 28                    | 102.9              | S7_GO     | 7                     | 114.8              |
| Rochester   | W9   | S5_ODT    | 14                    | -                  | S1_RF     | 0                     | 32.76              |
