# Supplementary material
Source: MDPI journal article supplement (https://www.mdpi.com/2073-4441/11/12/2447)
Supplement: s1 [file s1]

# Supplementary material for “Evaluation of Hydroclimatic Variability and Prospective Implementation of Irrigation Strategies in the U.S. Corn Belt”

Maria Elena Orduña Alegria <sup>1</sup>, Niels Schütze <sup>1</sup>, Dev Niyogi <sup>2</sup>

<sup>1</sup> Institute of Hydrology and Meteorology, Technische Universität Dresden, Bergstr. 66, 01069 Dresden, Germany

<sup>2</sup> Department of Agronomy and Department of Earth, Atmospheric, and Planetary Sciences, Purdue University, West Lafayette, IN, USA

Correspondence: maria\_elena.orduna\_alegria@tu-dresden.de

**SI: Detailed information about the weather station and important seeding and harvest date for each study site during each climatic conditions.**

## Data obtained from:

|                |                  |                                          |
|----------------|------------------|------------------------------------------|
| <b>General</b> | <b>People</b>    | Patton, S. L., Takle, E. S.              |
|                | <b>Institute</b> | Iowa State University                    |
|                | <b>Contact</b>   | Patton, S. L., srab@iaState.edu          |
|                | <b>Methods</b>   | MM5I_HADCM3 historical data from NARCCAP |
|                |                  | MM5I_HADCM3 future data from NARCCAP     |

## Weather Stations

H: Historical climatic conditions (1981:2010) and F: Future climatic conditions (2041-2070)

| Marysville E1    |           |                  | Kirkville W1     |           |                  |
|------------------|-----------|------------------|------------------|-----------|------------------|
| Latitude         | Longitude | Altitude (m)     | Latitude         | Longitude | Altitude (m)     |
| 40.2339          | -83.3663  | 303              | 40.1936          | -92.5794  | 300              |
| Seeding Date (H) |           | Harvest Date (H) | Seeding Date (H) |           | Harvest Date (H) |
| 1-May            |           | 28-Sep           | 20-Apr           |           | 17-Sep           |
| Seeding Date (F) |           | Harvest Date (F) | Seeding Date (F) |           | Harvest Date (F) |
| 24-Apr           |           | 21-Sep           | 11-Apr           |           | 8-Sep            |
| Toledo E2        |           |                  | Topeka W2        |           |                  |
| Latitude         | Longitude | Altitude (m)     | Latitude         | Longitude | Altitude (m)     |
| 41.6656          | -83.5753  | 187              | 39.0558          | -95.6894  | 282              |
| Seeding Date (H) |           | Harvest Date (H) | Seeding Date (H) |           | Harvest Date (H) |
| 1-May            |           | 28-Sep           | 25-Apr           |           | 22-Sep           |
| Seeding Date (F) |           | Harvest Date (F) | Seeding Date (F) |           | Harvest Date (F) |
| 24-Apr           |           | 21-Sep           | 15-Apr           |           | 12-Sep           |
| Huntington E3    |           |                  | New Madrid W3    |           |                  |
| Latitude         | Longitude | Altitude (m)     | Latitude         | Longitude | Altitude (m)     |
| 40.8819          | -85.4956  | 224              | 36.5878          | -89.5358  | 90               |
| Seeding Date (H) |           | Harvest Date (H) | Seeding Date (H) |           | Harvest Date (H) |
| 5-May            |           | 2-Oct            | 20-Apr           |           | 17-Sep           |
| Seeding Date (F) |           | Harvest Date (F) | Seeding Date (F) |           | Harvest Date (F) |
| 1-May            |           | 28-Sep           | 11-Apr           |           | 8-Sep            |
| Baraboo E4       |           |                  | Olivia W4        |           |                  |
| Latitude         | Longitude | Altitude (m)     | Latitude         | Longitude | Altitude (m)     |
| 43.4681          | -89.7417  | 266              | 44.7758          | -94.9919  | 325              |
| Seeding Date (H) |           | Harvest Date (H) | Seeding Date (H) |           | Harvest Date (H) |
| 1-May            |           | 28-Sep           | 3-May            |           | 30-Sep           |
| Seeding Date (F) |           | Harvest Date (F) | Seeding Date (F) |           | Harvest Date (F) |
| 2-May            |           | 29-Sep           | 26-Apr           |           | 23-Sep           |
| DeKalb E5        |           |                  | Brookings W5     |           |                  |
| Latitude         | Longitude | Altitude (m)     | Latitude         | Longitude | Altitude (m)     |
| 41.9314          | -88.7503  | 266              | 44.3064          | -96.7881  | 504              |
| Seeding Date (H) |           | Harvest Date (H) | Seeding Date (H) |           | Harvest Date (H) |
| 30-Apr           |           | 27-Sep           | 9-May            |           | 6-Oct            |
| Seeding Date (F) |           | Harvest Date (F) | Seeding Date (F) |           | Harvest Date (F) |
| 21-Apr           |           | 18-Sep           | 2-May            |           | 29-Sep           |
| Beloit E6        |           |                  | Iowa City W6     |           |                  |
| Latitude         | Longitude | Altitude (m)     | Latitude         | Longitude | Altitude (m)     |
| 42.5083          | -89.0317  | 227              | 41.6558          | -91.525   | 204              |
| Seeding Date (H) |           | Harvest Date (H) | Seeding Date (H) |           | Harvest Date (H) |
| 1-May            |           | 28-Sep           | 2-May            |           | 29-Sep           |
| Seeding Date (F) |           | Harvest Date (F) | Seeding Date (F) |           | Harvest Date (F) |
| 2-May            |           | 29-Sep           | 25-Apr           |           | 22-Sep           |

Supplementary material for “Evaluation of Hydroclimatic Variability and Prospective Implementation of Irrigation Strategies in the U.S. Corn Belt”

Maria Elena Orduña Alegria <sup>1</sup>, Niels Schütze <sup>1</sup>, Dev Niyogi <sup>2</sup>

<sup>1</sup> Institute of Hydrology and Meteorology, Technische Universität Dresden, Bergstr. 66, 01069 Dresden, Germany

<sup>2</sup> Department of Agronomy and Department of Earth, Atmospheric, and Planetary Sciences, Purdue University, West Lafayette, IN, USA

Correspondence: maria\_elena.orduna\_alegria@tu-dresden.de

**SI: Detailed information about the weather station and important seeding and harvest date for each study site during each climatic conditions.**

| Weather Stations                                                                            |           |                  |                  |           |                  |
|---------------------------------------------------------------------------------------------|-----------|------------------|------------------|-----------|------------------|
| H: Historical climatic conditions (1981:2010) and F: Future climatic conditions (2041-2070) |           |                  |                  |           |                  |
| Rensselaer E7                                                                               |           |                  | Grand Forks W7   |           |                  |
| Latitude                                                                                    | Longitude | Altitude (m)     | Latitude         | Longitude | Altitude (m)     |
| 40.9381                                                                                     | -87.1514  | 202              | 47.9253          | -97.0325  | 381              |
| Seeding Date (H)                                                                            |           | Harvest Date (H) | Seeding Date (H) |           | Harvest Date (H) |
| 5-May                                                                                       |           | 2-Oct            | 13-May           |           | 10-Oct           |
| Seeding Date (F)                                                                            |           | Harvest Date (F) | Seeding Date (F) |           | Harvest Date (F) |
| 1-May                                                                                       |           | 28-Sep           | 2-May            |           | 29-Sep           |
| Tuscola E8                                                                                  |           |                  | Columbus W8      |           |                  |
| Latitude                                                                                    | Longitude | Altitude (m)     | Latitude         | Longitude | Altitude (m)     |
| 41.9314                                                                                     | -88.7503  | 266              | 41.4328          | -97.3586  | 440              |
| Seeding Date (H)                                                                            |           | Harvest Date (H) | Seeding Date (H) |           | Harvest Date (H) |
| 30-Apr                                                                                      |           | 27-Sep           | 3-May            |           | 30-Sep           |
| Seeding Date (F)                                                                            |           | Harvest Date (F) | Seeding Date (F) |           | Harvest Date (F) |
| 21-Apr                                                                                      |           | 18-Sep           | 27-Apr           |           | 24-Sep           |
|                                                                                             |           |                  | Rochester W9     |           |                  |
|                                                                                             |           |                  | Latitude         | Longitude | Altitude (m)     |
|                                                                                             |           |                  | 44.0234          | -92.463   | 303              |
|                                                                                             |           |                  | Seeding Date (H) |           | Harvest Date (H) |
|                                                                                             |           |                  | 3-May            |           | 30-Sep           |
|                                                                                             |           |                  | Seeding Date (F) |           | Harvest Date (F) |
|                                                                                             |           |                  | 26-Apr           |           | 23-Sep           |
